# Supplementary material
Source: PubMed Central journal article supplement (PMC1298917)
Supplement: nar_33_20_6621__1.pdf [file nar_33_20_6621__1.pdf]

**Supplementary Material.** We have uploaded to the journal's submission web site and have made available, at <http://www.chem.lsa.umich.edu/chem-it/Groups/Andricioaei/downloads.html>, two movies (movie1 is relax\_pos.avi(mpg), and movie2 is relax\_neg.avi(mpg)) illustrating the simulations of the relaxation of positive and negative supercoils, respectively.
